# Supplementary material for: Combinatorial interactions of Hox genes establish appendage diversity of the amphipod crustacean Parhyale hawaiensis
Source: bioRxiv or medRxiv preprint supplement (doi:10.1101/2022.03.25.485717), 2022-03-27
Supplement: Supplementary file [file media-1.pdf]

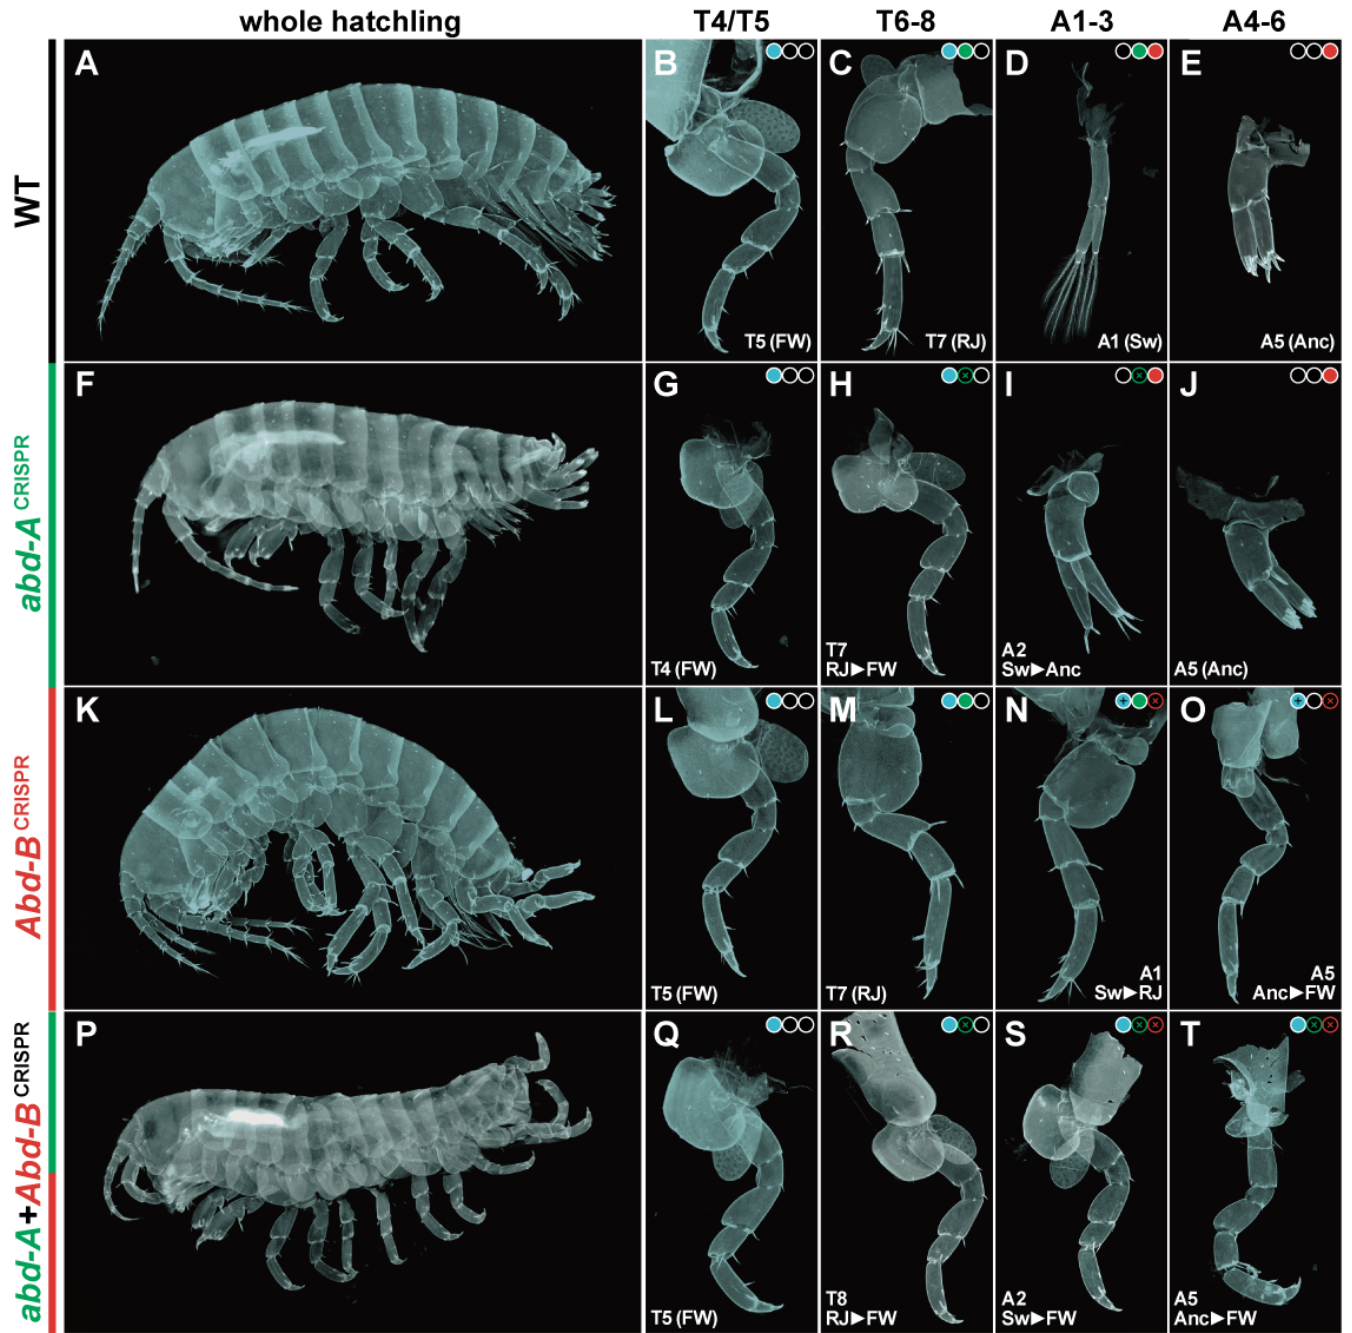

Supp. Fig. 1: Summaries of *abd-A*, *Abd-B*, and *abd-A + Abd-B* mutant phenotypes.
